# Supplementary material
Source: PubMed Central journal article supplement (PMC4215384)
Supplement: Supp_Fig1.pdf [file Supp_Fig1.pdf]

## Supplementary Data

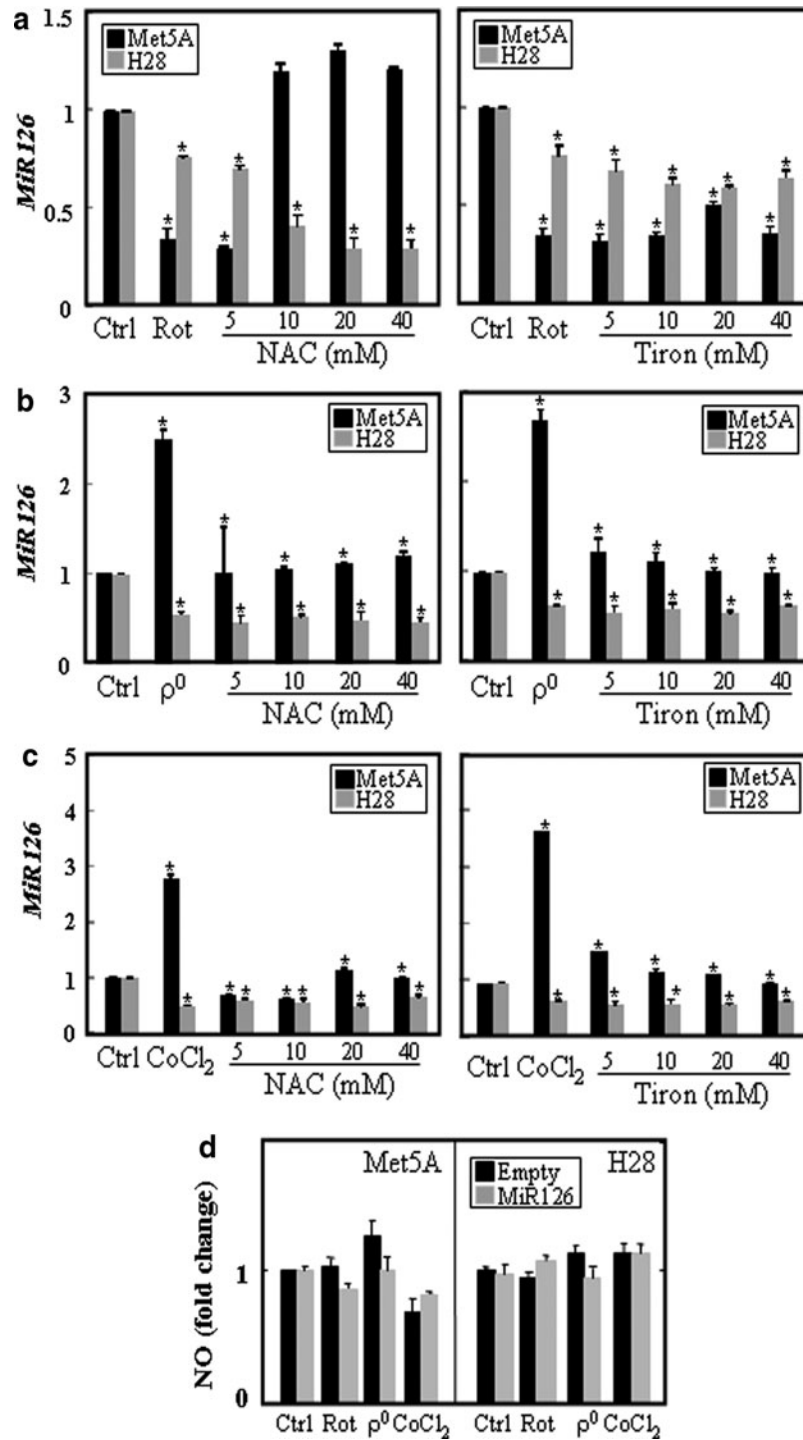

**SUPPLEMENTARY FIG. S1. Dose response of ROS inhibitors NAC and Tiron to mitochondria destabilizing stimuli, and NO generation in response to MiR126.** Met5A and H28 cells were evaluated for MiR126 level after treatment with rotenone (20  $\mu\text{M}$ , 24 h) (a), deletion of mtDNA (b), or exposure to the hypoxia mimetic  $\text{CoCl}_2$  (100  $\mu\text{M}$ , 5 h) (c) in the presence of increasing concentrations of NAC (left panel) and Tiron (right panel). Panel (d) shows the level of NO generation in empty plasmid- and MiR126-transfected Met5A and H28 cells when exposed to rotenone, after the depletion of mtDNA ( $\rho^0$  cells) or after exposure to the hypoxia mimetic  $\text{CoCl}_2$ . The level of NO in control cells was set as 1. The results are the mean  $\pm$  SD of three experiments performed in duplicate. Comparisons among groups were determined by one-way ANOVA with Tukey *post-hoc* analysis. The symbol “\*” indicates significant differences compared with control with  $p < 0.05$ . ANOVA, analysis of variance; MiR, microRNA; mtDNA, mitochondrial DNA; NAC, N-acetyl cysteine; NO, nitric oxide; ROS, reactive oxygen species.
