# Supplementary material
Source: PubMed Central journal article supplement (PMC4215384)
Supplement: Supp_Fig2.pdf [file Supp_Fig2.pdf]

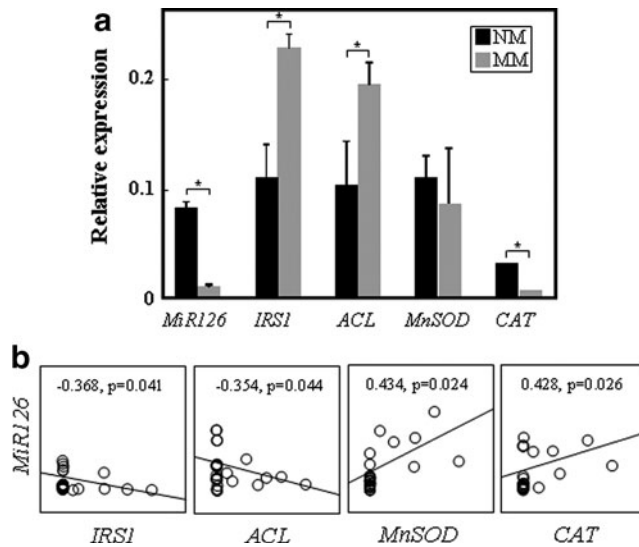

**SUPPLEMENTARY FIG. S2. Relative expression of MiR126, IRS1, ACL, MnSOD, and CAT and their correlation in human MM biopsies.** (a) MiR126, IRS1, ACL, MnSOD, and CAT gene expression were evaluated in cancerous (MM) and the adjacent noncancerous (NM) formalin-fixed, paraffin-embedded (FFPE) tissue of MM subjects. Panel (b) shows the relationships between MiR126 and IRS1, ACL, MnSOD, and CAT gene expression. All results are expressed as mean  $\pm$  S.D. Comparisons among groups of data were made using one-way ANOVA with Tukey *post-hoc* analysis. The associations between MiR126 and gene expression were evaluated by Spearman's rank correlation test. Differences with  $p < 0.05$  were considered statistically significant. ACL, ATP-citrate lyase; CAT, catalase; IRS1, insulin receptor substrate-1; MM, malignant mesothelioma; MnSOD, manganese superoxide dismutase; NM, normal mesothelium.
