# Supplementary material
Source: PubMed Central journal article supplement (PMC4215384)
Supplement: Supp_Fig3.pdf [file Supp_Fig3.pdf]

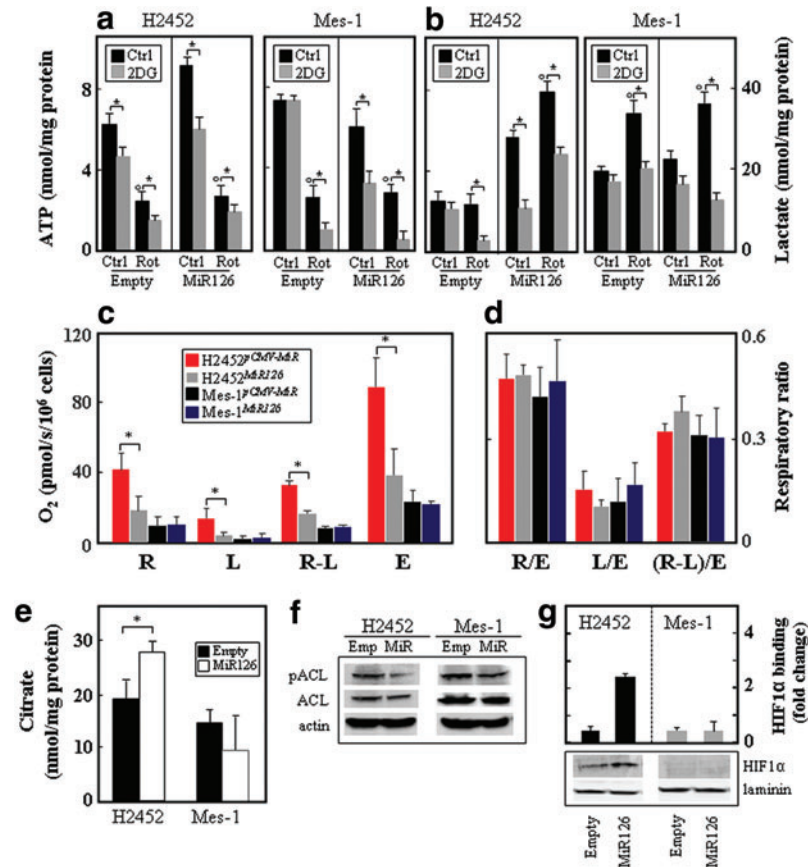

**SUPPLEMENTARY FIG. S3. MiR126-induced metabolic changes are associated with HIF1 $\alpha$  activation.** Empty plasmid- and MiR126-transfected H2452 and Mes-1 cells in the presence of rotenone (20  $\mu$ M, 5 h) and 2DG (5 mM, 5 h), as shown, were evaluated for ATP level (nmol/mg protein) (a), lactate production (nmol/mg protein), (b) respiration (c, d), citrate level (nmol/mg protein) (e), pACL/ACL protein expression (f), and HIF1 $\alpha$  DNA binding and protein level (g). The results are the mean  $\pm$  SD of three experiments performed in duplicate, images are representative of three independent experiments. Comparisons between groups were performed using the two-tailed Student's *t*-test; the symbol “\*” indicates significantly different values, and the symbol “<sup>o</sup>” significance compared with control with *p* < 0.05. 2DG, 2-deoxyglucose; HIF1 $\alpha$ , hypoxia-inducible factor-1 $\alpha$ .
