# Supplementary material
Source: PubMed Central journal article supplement (PMC4215384)
Supplement: Supp_Fig4.pdf [file Supp_Fig4.pdf]

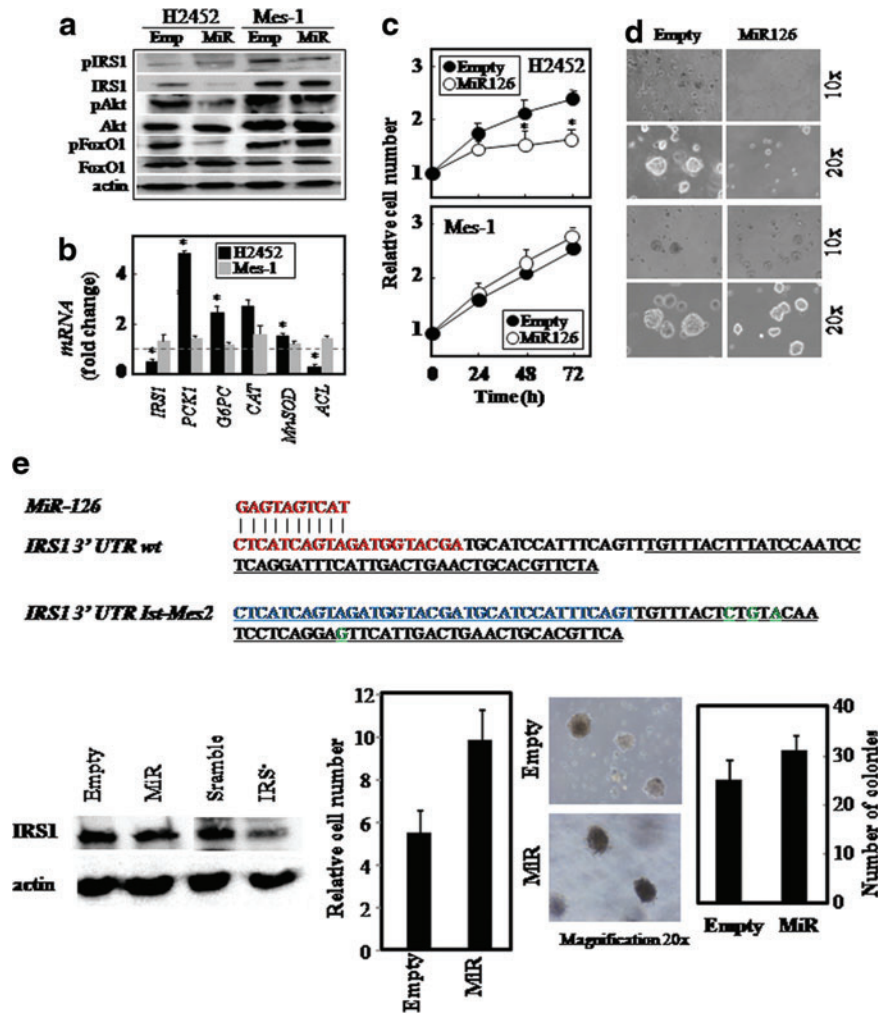

**SUPPLEMENTARY FIG. S4. MiR126 suppresses the malignant phenotype in H2452 cells but not in Mes-1 and Ist-Mes2 cells.** Empty plasmid- and MiR126-transfected H2452 and Mes-1 cells were evaluated for the level of expression of pIRS1 (S307), IRS1, pAkt, Akt, pFoxO1 (T24) and FoxO1 (a), and the level of the mRNA of IRS1, the gluconeogenesis genes PCK1 and G6PC, and oxidative defense genes CAT and MnSOD, as well as ACL (b). The cells were also assessed for their proliferation rates using the MTT assay (c) and the colony-forming activity (d). Ist-Mes2 cells with truncated IRS1 lacking the MiR126-binding site at the 3'-UTR of IRS1 (blue sequence) were transfected with MiR126 or siRNA against IRS1. IRS1 protein levels were determined by western blotting. The empty plasmid-transfected Ist-Mes2 and their MiR126-transfected counterparts were evaluated for cell growth and colony-forming activity (e). The results are the mean  $\pm$  SD of three experiments performed in duplicate; images are representative of three independent experiments. Comparisons among and between groups were determined by one-way ANOVA with Tukey *post-hoc* analysis, and by the two-tailed Student's *t*-test, respectively. The symbol "\*" indicates significantly different values with  $p < 0.05$ . FoxO1, Forkhead box O1; G6PC, glucose-6-phosphatase catalytic; MTT, 3-(4,5-dimethylthiazol-2-yl)-2,5-diphenyltetrazolium bromide; PCK1, phosphoenolpyruvate carboxykinase 1; siRNA, small interfering RNA.
