# Supplementary material
Source: PubMed Central journal article supplement (PMC4215384)
Supplement: Supp_Fig5.pdf [file Supp_Fig5.pdf]

| <b>mtDNA</b> |                                  |                                     | <b>nDNA</b>  |                                      |                                   |
|--------------|----------------------------------|-------------------------------------|--------------|--------------------------------------|-----------------------------------|
|              | <i>Forward</i>                   | <i>Reverse</i>                      |              | <i>Forward</i>                       | <i>Reverse</i>                    |
| <b>MTRT1</b> | <b>CACCCAAGAA<br/>CAGGGTTTGT</b> | <b>TGGCCATGGGT<br/>ATGTTGTTA</b>    | <b>MTAIB</b> | <b>GAGTTCCTGGA<br/>CAAATGAG</b>      | <b>CATGTTCATAT<br/>CTCTGGCG</b>   |
| <b>MTRT2</b> | <b>TCCTCCTATCC<br/>CTCAACCCC</b> | <b>CACAATCTGATG<br/>TTTTGGTAAAC</b> | <b>MTB2M</b> | <b>TGCTGCTCCATG<br/>TTIGATGIATCT</b> | <b>TCCTGCTCCCA<br/>CCTCTAAGT</b>  |
| <b>MTRT3</b> | <b>CACTGGTICC<br/>TACTTCAGGG</b> | <b>TGAGTGGTAAAT<br/>AGGGTGATAGA</b> | <b>MTBA</b>  | <b>AGCGGAAAATCG<br/>TGCCTGAC</b>     | <b>AGGCAGCTCGIAG<br/>CTCTTCTC</b> |
| <b>MTRT4</b> | <b>ATGGCCACCA<br/>TAATTACCC</b>  | <b>CATTTGGTICT<br/>CAGGGTTTG</b>    |              |                                      |                                   |

SUPPLEMENTARY FIG. S5. Mitochondrial (mt) DNA and nuclear (n) DNA primers. Primers used for mtDNA copy evaluation are shown.
